# Supplementary material for: Chlortetracycline promotes differentiation of intestinal bacterial community in broiler chicken
Source: Research Square preprint supplement (doi:10.21203/rs.3.rs-107746/v1), 2020-11-18
Supplement: Supplementary file 1 [file 10e35b22aa382da4d36cde49.xlsx]

## Sheet: Table S1
Table S1.Changes in taxonomic phyla over time in different samples (%).
index	T0-C	T2-C	T5-C	ST7-C	ST10-C	ST15-C	ST20-C	T0-L	T2-L	T5-L	ST7-L	ST10-L	ST15-L	ST20-L	T0-T	T2-T	T5-T	ST7-T	ST10-T	ST15-T	ST20-T	Average
Acidobacteria	0.163559	0	0	0.614497	0.499678	0.210152	0	1.01351	0.668338	0	0.530116	0	0.355605	0.370745	0	0.215692	0.168241	0.422125	0.0749064	0	0.579929	0.280338
Actinobacteria	0	0	1.06289	0.0311964	0	0.431891	0	2.83224	0.120664	0	0.118371	0.842224	0.25953	0	1.12086	0.12582	0.0877029	0	0.425985	0.595024	0	0.383543
Bacteroidetes	18.494	18.0476	21.4382	18.3021	18.9388	24.2483	24.3459	15.9056	18.3131	21.161	18.7396	24.2129	20.8981	23.1329	16.5677	14.8265	12.9173	15.7639	18.1748	18.7124	21.6346	19.275
Chloroflexi	0.821168	0	0	0.421151	0.128949	0.0259134	0.128783	1.39604	0.467572	0	0	0.214195	0.512269	0.909017	0.202429	0.0439754	0	0.0291121	0.319489	0.0130489	0.35545	0.28517
Cyanobacteria	0.130847	0	0	0	0	0.355642	0	0	0	0.201694	0.30349	0.195095	0.213437	0	0	0	0.0519886	0	0	0.130489	0	0.0753658
Firmicutes	19.1381	21.9656	18.0419	35.9831	27.3581	29.497	19.606	21.5164	28.7257	30.0756	36.4749	28.6712	32.4598	27.9285	21.1127	34.0893	44.4116	33.5036	27.5367	33.1621	28.4184	28.556
Nitrospirae	0.456204	0	0	0	0	0	0.413403	0.715842	0	0	0.174	0	0.389294	0	0	0.0879507	0.0238095	0	0.0898876	0	0.0296209	0.113334
Proteobacteria	59.2065	56.1984	57.3102	43.3824	50.2488	43.056	53.5566	46.8979	49.011	48.1046	40.6767	42.1661	41.1669	44.5593	57.4698	45.8769	39.8834	45.2591	48.8665	41.52	46.473	47.6614
Tenericutes	0.425254	0	0.692161	0.218955	0.576712	0.138205	0	0.365631	0	0.336157	0.743054	0.894534	0.621752	0	0	0.249194	0.563526	0.692411	0.960791	0.91113	0.128357	0.405611
others	1.16437	3.78847	1.45459	1.04671	2.24899	2.03693	1.94928	9.35688	2.69371	0.121017	2.23974	2.80381	3.12331	3.09953	3.5266	4.48467	1.89253	4.32978	3.55098	4.95581	2.38065	2.96421
Note: others meant the rest phyla in this study.

## Sheet: Table S2
Table S2. Changes in taxonomic genera over time in the groups (%).
index	T0-C	T2-C	T5-C	ST7-C	ST10-C	ST15-C	ST20-C	T0-L	T2-L	T5-L	ST7-L	ST10-L	ST15-L	ST20-L	T0-T	T2-T	T5-T	ST7-T	ST10-T	ST15-T	ST20-T	Average
Bacteroides	0.0977501	0.0788986	0.122519	0.0736133	0.067337	0.0681437	0.114116	0.0850037	0.103407	0.129047	0.0673457	0.0704084	0.095302	0.104445	0.105748	0.0976266	0.0901084	0.103633	0.0637349	0.0537333	0.0931824	0.0897668
Shigella	0.0709426	0.075699	0.139781	0.0649177	0.0253685	0.022128	0.0638579	0.0793039	0.088095	0.0830676	0.0359965	0.0264966	0.0228593	0.027698	0.092883	0.0340795	0.0111481	0.0174094	0.0327433	0.0120067	0.0177221	0.049724
Oscillospira	0.037612	0.0248834	0.0264756	0.0636187	0.0278032	0.0254925	0.0225714	0.0221615	0.0235717	0.037184	0.055384	0.0347574	0.0394687	0.0155397	0.01587	0.0453108	0.0786275	0.0505898	0.0606083	0.0497609	0.0309465	0.0375351
Pelargonium	0.0537067	0.020671	0.019176	0.00354499	0.0870823	0.0326071	0.0477085	0.0187891	0.0085752	0.0363193	0.0231761	0.0424135	0.0229715	0.0531514	0.059519	0.0410739	0.0215992	0.0360443	0.0457142	0.0378662	0.0557501	0.0365457
Alistipes	0.0269325	0.0237677	0.0355803	0.033984	0.0334187	0.06962	0.0629503	0.0266149	0.0223031	0.0210792	0.0387656	0.041338	0.0531681	0.0481398	0.0170366	0.0159648	0.0179854	0.0199216	0.0436527	0.0474739	0.0511936	0.0357567
Faecalibacterium	0.0107949	0.0272072	0.0359154	0.0370183	0.0119228	0.026647	0.011253	0.0238119	0.0274757	0.00826233	0.0210651	0.0184258	0.0443521	0.028789	0.0151093	0.0439861	0.0703456	0.0344414	0.0128205	0.0481034	0.0399289	0.0284607
Ruminococcus	0.00715137	0.0053222	0.0116582	0.0111017	0.0171904	0.0138374	0.0099671	0.00818277	0.0125881	0.0106827	0.0322742	0.0493552	0.0175953	0.00374822	0.00081367	0.0056619	0.021355	0.0354898	0.0206321	0.0153785	0.0173945	0.0155895
Afipia	0.0209854	0.0279696	0.0297428	0.0336428	0.00537364	0.00858369	0.00515132	0.0135135	0.00859728	0	0.00746293	0	0.00519059	0	0.0263531	0	0.00147301	0.0114085	0.00898876	0.00312125	0.00296209	0.010501
others	0.674125	0.715581	0.579152	0.678558	0.724504	0.732941	0.662424	0.722619	0.705387	0.674358	0.71853	0.716805	0.699092	0.718489	0.666668	0.716296	0.687358	0.691062	0.711105	0.732556	0.69092	0.69612
Note: others in Figure 3b meant the genera less than 1% and the unclassified genera in the study.

## Sheet: Table S3
Table S3. Changes in Chao1 index over time in the groups.
Group	Time	Chao1 index		Group	Time	Chao1 index		Group	Time	Chao1 index
C	T0-C1	42		L	T0-L1	55.1111		T	T0-T1	55.8571
	T0-C2	34			T0-L2	41.2			T0-T2	62.1111
	T0-C3	43.4286			T0-L3	38			T0-T3	51.6667
	T2-C1	41			T2-L1	37.25			T2-T1	78
	T2-C2	50.8571			T2-L2	78.625			T2-T2	72.8571
	T2-C3	77.5			T2-L3	45			T2-T3	52.6
	T5-C1	47.1429			T5-L1	58.125			T5-T1	126.143
	T5-C2	36.1111			T5-L2	25.75			T5-T2	115.273
	T5-C3	45			T5-L3	39.1429			T5-T3	70
	ST7-C1	41			ST7-L1	96.6			ST7-T1	65.4286
	ST7-C2	78.2			ST7-L2	59.1429			ST7-T2	86.6
	ST7-C3	72.5			ST7-L3	79.4286			ST7-T3	104.667
	ST10-C1	135			ST10-L1	74.2727			ST10-T1	86.1667
	ST10-C2	69.8			ST10-L2	73			ST10-T2	65.6667
	ST10-C3	79.5			ST10-L3	46.6			ST10-T3	81
	ST15-C1	105.158			ST15-L1	64.5			ST15-T1	88.5
	ST15-C2	107.056			ST15-L2	66			ST15-T2	117
	ST15-C3	79.75			ST15-L3	93.5			ST15-T3	55
	ST20-C1	94.3333			ST20-L1	72.5			ST20-T1	71.2727
	ST20-C2	68.75			ST20-L2	46			ST20-T2	42
	ST20-C3	64			ST20-L3	64			ST20-T3	82.25

## Sheet: Table S4
Table S4. Changes in Shannon index over time in the groups.
Group	Time	Shannon index		Group	Time	Shannon index		Group	Time	Shannon index
C	T0-C1	4.72913		L	T0-L1	5.04192		T	T0-T1	4.97714
	T0-C2	4.33146			T0-L2	4.75633			T0-T2	5.10863
	T0-C3	4.74082			T0-L3	4.43917			T0-T3	4.89078
	T2-C1	4.77423			T2-L1	4.52343			T2-T1	5.82733
	T2-C2	4.84225			T2-L2	5.34384			T2-T2	5.39684
	T2-C3	4.93636			T2-L3	4.54599			T2-T3	4.68753
	T5-C1	4.80717			T5-L1	5.17439			T5-T1	6.09612
	T5-C2	4.24832			T5-L2	3.72523			T5-T2	6.33386
	T5-C3	4.89074			T5-L3	4.55702			T5-T3	5.58175
	ST7-C1	4.26101			ST7-L1	5.65189			ST7-T1	5.36576
	ST7-C2	5.50655			ST7-L2	4.72865			ST7-T2	5.88129
	ST7-C3	5.08369			ST7-L3	5.63228			ST7-T3	6.06334
	ST10-C1	5.308			ST10-L1	5.21194			ST10-T1	5.38573
	ST10-C2	5.18971			ST10-L2	5.43721			ST10-T2	5.3025
	ST10-C3	5.11954			ST10-L3	4.64344			ST10-T3	4.79131
	ST15-C1	5.4301			ST15-L1	5.32235			ST15-T1	5.7624
	ST15-C2	5.69404			ST15-L2	4.93033			ST15-T2	6.14196
	ST15-C3	5.26136			ST15-L3	5.78095			ST15-T3	5.08382
	ST20-C1	4.99989			ST20-L1	5.45881			ST20-T1	5.39412
	ST20-C2	4.88983			ST20-L2	4.74512			ST20-T2	4.84222
	ST20-C3	4.87656			ST20-L3	5.18764			ST20-T3	5.83559

## Sheet: Table S5
Table S5. Changes in PD whole tree index over time in the groups.
Group	time	PD		Group	time	PD		Group	time	PD
C	T0-C1	15.2619		L	T0-L1	16.7195		T	T0-T1	16.9501
	T0-C2	14.0806			T0-L2	15.8153			T0-T2	16.6838
	T0-C3	15.3216			T0-L3	13.3263			T0-T3	15.604
	T2-C1	14.323			T2-L1	14.5808			T2-T1	17.2098
	T2-C2	15.6718			T2-L2	17.8809			T2-T2	18.8825
	T2-C3	16.273			T2-L3	12.8233			T2-T3	14.6578
	T5-C1	14.0806			T5-L1	17.2518			T5-T1	21.5491
	T5-C2	12.7858			T5-L2	10.2954			T5-T2	19.8576
	T5-C3	14.9981			T5-L3	14.0424			T5-T3	17.4479
	ST7-C1	13.1105			ST7-L1	21.2872			ST7-T1	18.6279
	ST7-C2	17.9796			ST7-L2	15.8572			ST7-T2	19.4539
	ST7-C3	15.6573			ST7-L3	18.8013			ST7-T3	20.1714
	ST10-C1	17.3025			ST10-L1	17.5714			ST10-T1	19.8341
	ST10-C2	17.4438			ST10-L2	18.4395			ST10-T2	17.2533
	ST10-C3	17.5897			ST10-L3	15.2915			ST10-T3	15.8435
	ST15-C1	19.2691			ST15-L1	18.2831			ST15-T1	18.6985
	ST15-C2	20.5389			ST15-L2	16.9139			ST15-T2	19.9217
	ST15-C3	18.2899			ST15-L3	19.9109			ST15-T3	17.4045
	ST20-C1	17.6002			ST20-L1	16.9654			ST20-T1	17.6129
	ST20-C2	15.7254			ST20-L2	15.5371			ST20-T2	14.8006
	ST20-C3	15.6759			ST20-L3	16.1686			ST20-T3	18.9517

## Sheet: Table S6
Table S6. Weighted Unifrac distance between control group and antibiotic-treated groups.
	T2-L1	T2-L2	T2-L3	T5-L1	T5-L2	T5-L3	ST7-L1	ST7-L2	ST7-L3	ST10-L1	ST10-L2	ST10-L3	ST15-L1	ST15-L2	ST15-L3	ST20-L1	ST20-L2	ST20-L3	T2-T1	T2-T2	T2-T3	T5-T1	T5-T2	T5-T3	ST7-T1	ST7-T2	ST7-T3	ST10-T1	ST10-T2	ST10-T3	ST15-T1	ST15-T2	ST15-T3	ST20-T1	ST20-T2	ST20-T3
T0-C1	0.559597	0.664795	1.15284	0.310992	1.64824	1.00015	0.506196	0.717623	0.682486	0.568606	0.373409	0.477725	0.419614	0.521232	0.463881	0.615152	0.429862	0.562408	0.320166	0.625226	0.777228	0.543457	0.484731	0.363284	0.669633	1.10753	0.448997	0.757594	0.500413	0.757765	0.36079	1.14149	0.424198	0.920191	0.709691	0.535484
T0-C2	0.536	0.505244	1.72618	0.857779	2.21673	0.313878	0.702869	1.19584	1.33991	1.08835	0.857711	0.802489	0.851975	0.665426	1.14634	0.576988	0.793381	0.631694	0.963324	0.567821	0.450523	1.08961	0.964769	0.924617	0.52896	0.612279	0.96349	0.375641	0.768922	0.432977	0.978256	0.618489	0.931434	0.291099	0.590994	0.643121
T0-C3	1.0882	1.06225	2.31203	1.41323	2.84573	0.769009	1.23577	1.77901	1.88513	1.64994	1.42666	1.39653	1.40103	1.24242	1.66897	1.21354	1.32506	1.21092	1.4839	1.07944	1.03407	1.67851	1.48591	1.48598	1.0705	0.746406	1.55573	0.93706	1.31168	0.970799	1.51237	0.660062	1.48609	0.85063	1.173	1.19385
T2-C1	0.347628	0.256616	1.49128	0.624242	2.03587	0.52784	0.438722	1.02504	1.08002	0.914374	0.652349	0.677052	0.67242	0.524422	0.875933	0.504028	0.571337	0.473157	0.681522	0.276212	0.366978	0.904651	0.676006	0.706574	0.274519	0.691618	0.796164	0.304185	0.54956	0.391424	0.712429	0.718646	0.76555	0.451671	0.483123	0.394388
T2-C2	0.302271	0.26726	1.46481	0.570326	1.99435	0.536504	0.380096	0.941276	1.023	0.835246	0.593559	0.603407	0.57981	0.431998	0.838839	0.41238	0.499323	0.388653	0.64269	0.273093	0.339554	0.848883	0.651871	0.644872	0.288699	0.746286	0.726732	0.29289	0.491261	0.41556	0.674923	0.780264	0.663289	0.491525	0.422986	0.356647
T2-C3	0.523984	0.445857	1.68443	0.81958	2.23001	0.258955	0.659945	1.17008	1.29669	1.06545	0.842336	0.801997	0.816626	0.645141	1.10368	0.604975	0.716965	0.586559	0.920587	0.525266	0.460522	1.09288	0.924423	0.909668	0.504238	0.53767	0.979266	0.332501	0.723066	0.409868	0.933017	0.567502	0.895236	0.270987	0.602945	0.593778
T5-C1	0.562125	0.75841	1.03225	0.360475	1.55686	0.978433	0.650908	0.549711	0.715419	0.446	0.346753	0.4535	0.365494	0.480671	0.504538	0.539688	0.420307	0.555873	0.47982	0.761927	0.773101	0.469255	0.661425	0.359951	0.743798	1.22911	0.352693	0.737145	0.483066	0.906591	0.441089	1.24617	0.348198	0.922991	0.603998	0.555299
T5-C2	0.400973	0.643287	1.32868	0.605057	1.72732	0.818073	0.522802	0.917378	1.07608	0.808966	0.587821	0.561286	0.57959	0.371859	0.871702	0.385638	0.501725	0.420153	0.700644	0.627475	0.597632	0.838251	0.694073	0.658727	0.612871	1.09871	0.692065	0.610684	0.508517	0.733302	0.731584	1.11148	0.672009	0.78218	0.465934	0.444694
T5-C3	1.01011	1.14905	0.672678	0.749945	1.13737	1.45617	0.970716	0.427924	0.379466	0.686812	0.788868	0.9481	0.840729	0.985023	0.602432	1.08076	0.883206	1.0537	0.771069	1.0936	1.23673	0.61629	0.92904	0.735112	1.11894	1.55983	0.704308	1.21322	0.900412	1.24509	0.783968	1.59141	0.802704	1.34828	1.1467	0.982176
ST7-C1	1.09685	1.26	0.547863	0.851983	1.11446	1.43901	1.12801	0.428961	0.521151	0.746652	0.873512	0.955568	0.876024	1.00384	0.776333	1.06376	0.948025	1.04934	0.945161	1.25396	1.28096	0.692039	1.12473	0.833591	1.23644	1.74015	0.778659	1.25121	0.966952	1.38327	0.917054	1.75777	0.827762	1.45253	1.14512	1.07149
ST7-C2	1.1742	1.23353	0.6073	0.832412	1.08784	1.54235	1.04327	0.560438	0.36193	0.770988	0.867013	1.04537	0.946245	1.07481	0.62094	1.17626	0.996994	1.12149	0.835213	1.17998	1.43528	0.7032	0.948649	0.833875	1.19719	1.59351	0.814289	1.3529	0.994549	1.36336	0.796565	1.62675	0.867202	1.4311	1.22814	1.0393
ST7-C3	0.851169	0.928889	0.821441	0.535617	1.30858	1.21938	0.76922	0.29717	0.244587	0.482563	0.574314	0.714516	0.657919	0.761977	0.372113	0.861785	0.664208	0.790659	0.559382	0.87935	1.11101	0.411406	0.718774	0.548715	0.918274	1.35432	0.541509	1.03843	0.701039	1.04818	0.544726	1.36857	0.563327	1.12896	0.934715	0.754537
ST10-C1	0.438155	0.288109	1.62771	0.661664	2.17705	0.34555	0.496616	1.06379	1.1066	0.930849	0.662114	0.705449	0.693071	0.550446	0.921753	0.514993	0.614435	0.471785	0.73953	0.345328	0.412593	0.948228	0.737805	0.757341	0.30686	0.553902	0.825044	0.256981	0.5782	0.287149	0.767929	0.572921	0.763235	0.284458	0.508247	0.455026
ST10-C2	0.670542	0.55489	1.86588	0.922289	2.38618	0.22049	0.704882	1.28189	1.34585	1.05592	0.883712	0.826964	0.845015	0.717966	1.13033	0.684635	0.80762	0.640742	0.989464	0.600461	0.613527	1.18451	0.961644	0.998597	0.586865	0.433709	1.06502	0.425273	0.763029	0.488884	0.997349	0.464233	0.902097	0.325254	0.610159	0.679098
ST10-C3	0.266994	0.321024	1.4525	0.508445	1.98535	0.557776	0.284377	0.899828	0.929995	0.716686	0.494425	0.52712	0.491586	0.359598	0.709805	0.357985	0.425027	0.294391	0.564371	0.287943	0.485029	0.767866	0.541942	0.578969	0.312094	0.753989	0.660822	0.373254	0.401117	0.447535	0.581383	0.779777	0.550189	0.51229	0.32455	0.263069
ST15-C1	0.767976	0.910421	1.05612	0.514513	1.6105	1.09042	0.75967	0.495467	0.609786	0.295236	0.494506	0.450765	0.448283	0.573782	0.423713	0.670985	0.570988	0.63099	0.610255	0.895666	0.960748	0.461907	0.790364	0.554129	0.885932	1.36767	0.473496	0.868317	0.598202	1.04758	0.559406	1.37519	0.355466	1.08506	0.687599	0.717492
ST15-C2	0.788245	0.842792	1.01411	0.432096	1.49509	1.13011	0.642592	0.447631	0.363126	0.335002	0.450575	0.642769	0.515053	0.685783	0.203614	0.735421	0.576895	0.721157	0.454371	0.794937	1.03	0.289396	0.561143	0.438341	0.821733	1.20091	0.418134	0.957068	0.576459	0.964927	0.381568	1.21336	0.459018	1.0219	0.787421	0.615504
ST15-C3	0.364187	0.484962	1.48133	0.575651	2.0291	0.632011	0.368829	0.863031	1.01023	0.700042	0.542246	0.476603	0.453448	0.344854	0.785755	0.286343	0.486508	0.283967	0.650235	0.454581	0.556842	0.835159	0.620615	0.647273	0.475804	0.886406	0.700993	0.45729	0.399015	0.639908	0.637684	0.9232	0.525766	0.613762	0.2175	0.341947
ST20-C1	0.347268	0.566041	1.35899	0.504967	1.88634	0.725045	0.409299	0.804813	0.963426	0.626068	0.480233	0.349662	0.413011	0.272639	0.755967	0.264059	0.397777	0.287185	0.593374	0.534378	0.580459	0.750375	0.580673	0.568611	0.528118	1.0074	0.624121	0.504525	0.37872	0.695029	0.609114	1.03342	0.513275	0.697764	0.267848	0.329791
ST20-C2	0.427394	0.384357	1.60497	0.720612	2.10913	0.523689	0.54676	1.07598	1.20795	0.911145	0.718417	0.698754	0.690715	0.537345	0.981951	0.43321	0.642882	0.512119	0.824304	0.437268	0.285754	0.952954	0.838246	0.78525	0.422139	0.780162	0.822772	0.302695	0.62117	0.472304	0.86794	0.813746	0.819515	0.478732	0.459574	0.505468
ST20-C3	0.617289	0.595061	1.79091	0.9236	2.2976	0.365587	0.746593	1.22139	1.39984	1.05343	0.884961	0.830905	0.819108	0.718282	1.17727	0.593998	0.820682	0.674375	1.027	0.62373	0.501909	1.1547	1.0167	0.981365	0.618608	0.647489	1.02126	0.421528	0.79439	0.508309	1.04346	0.674861	0.957283	0.335454	0.542078	0.700789
T0-L1	0.440301	0.608142	1.29855	0.48397	1.77399	0.89521	0.457365	0.859964	0.942287	0.755924	0.491914	0.537581	0.503274	0.421265	0.717943	0.502414	0.4369	0.461914	0.51814	0.560916	0.659765	0.731428	0.525732	0.536214	0.592551	1.04654	0.61196	0.637601	0.416147	0.694786	0.58246	1.08063	0.617235	0.802153	0.560326	0.42414
T0-L2	1.13523	1.05773	2.28567	1.45483	2.78239	0.860102	1.22643	1.82353	1.89948	1.66615	1.45303	1.43807	1.43349	1.30581	1.66107	1.26996	1.36862	1.23412	1.49438	1.08707	1.06854	1.71537	1.48173	1.52461	1.085	0.737907	1.59484	0.954911	1.36351	0.944684	1.52418	0.666606	1.54897	0.868518	1.23823	1.21003
T0-L3	0.95786	1.0399	0.705126	0.647231	1.17653	1.32571	0.935726	0.336037	0.316431	0.638931	0.702931	0.855297	0.788583	0.881556	0.558881	0.969983	0.791522	0.946728	0.706876	1.02975	1.18636	0.529733	0.890003	0.659223	1.04551	1.50592	0.617362	1.15809	0.865742	1.19549	0.726519	1.54078	0.701697	1.25327	1.05498	0.907555
T0-T1	0.432994	0.306145	1.60427	0.729328	2.04592	0.610711	0.503151	1.13126	1.1521	1.01112	0.755334	0.771993	0.77052	0.623959	0.952502	0.59252	0.675327	0.563154	0.749401	0.363464	0.383081	0.98734	0.733943	0.794971	0.365216	0.707403	0.874575	0.344511	0.692147	0.356827	0.807442	0.762237	0.860131	0.53411	0.600975	0.517576
T0-T2	0.698866	0.602454	1.86846	1.00704	2.36022	0.428818	0.773742	1.40565	1.4568	1.26706	1.02761	1.04059	1.02651	0.891719	1.23155	0.86958	0.958873	0.840301	1.02404	0.614009	0.653617	1.25697	1.00896	1.06387	0.644924	0.380432	1.13364	0.571249	0.93443	0.502716	1.07957	0.413588	1.10553	0.471024	0.852442	0.782101
T0-T3	0.600496	0.712977	1.06447	0.339177	1.532	0.984146	0.63507	0.594774	0.684927	0.467199	0.382282	0.504606	0.420273	0.497499	0.491811	0.560457	0.429768	0.5996	0.411654	0.730947	0.703662	0.41033	0.603169	0.31896	0.710448	1.17912	0.26539	0.786241	0.508396	0.895114	0.430444	1.22678	0.348641	0.939066	0.690782	0.56046
